# Supplementary material for: Direct surface coating of high voltage LiCoO2 cathode with P(VDF-HFP) based gel polymer electrolyte
Source: Royal Society of Chemistry journal article supplement (doi:10.1039/d0ra04023a), 2020-01-01
Supplement: d0ra04023a1.pdf [file d0ra04023a1.pdf]

## Supporting Information

### Direct surface coating of high voltage LiCoO<sub>2</sub> cathode with P(VDF-HFP) based gel polymer electrolyte

Huiling Chen, Yuehua Wen\*, Yue Wang, Songtong Zhang, Pengcheng Zhao, Hai Ming, Gaoping Cao, Jingyi Qiu\*

(Beijing Key Laboratory of Advanced Chemical Energy Storage Technology and Materials, Research Institute of Chemical Defense, Beijing 100191, China. E-mail: wen\_yuehua@126.com; qiujiingyi1202@163.com)

#### 1. Variation of dQ/dV curves

In Fig. S1, it can be clearly seen that the change of the discharge platform and the degree of polarization as the number of cycles increases. And the 3-PHL-LCO with well maintained capacity exhibits a small increase in polarization, but the reaction polarization of original LCO increases significantly, which is consistent with the result of charge-discharge curves of bare LCO and 3-PHL-LCO (Fig. 5d and e).

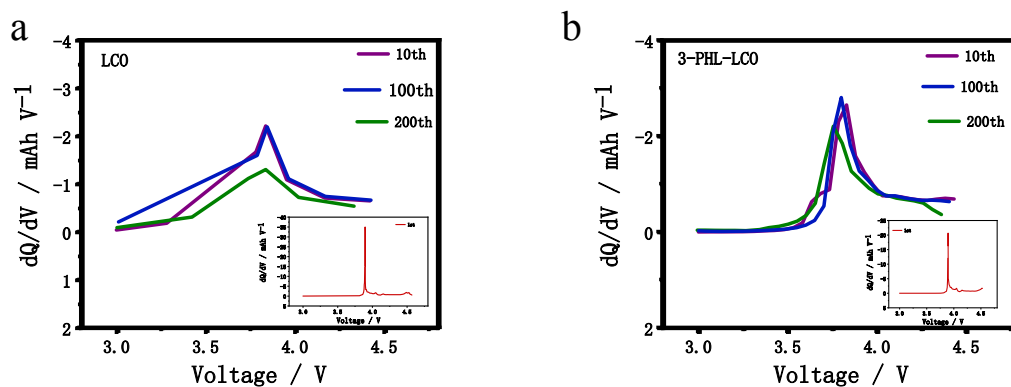

**Fig. S1.** Variation of dQ/dV curves at 1st, 10th, 100th, 200th cycle of (a) Bare LCO and (b) 3-PHL-LCO.

## 2.Characterization of thermal stability of 3-PHL-LCO under charging voltage of 4.6 V

The thermal stability of the cathode material was characterized by cycling at 50 °C and 1 C under charging voltage of 4.6 V. In Fig. S2, 3-PHL-LCO presents a high cycle retention rate of 80.01%, while the LCO is only 61.25%. It shows that the thermal stability of LCO can be significantly improved by PHL coating.

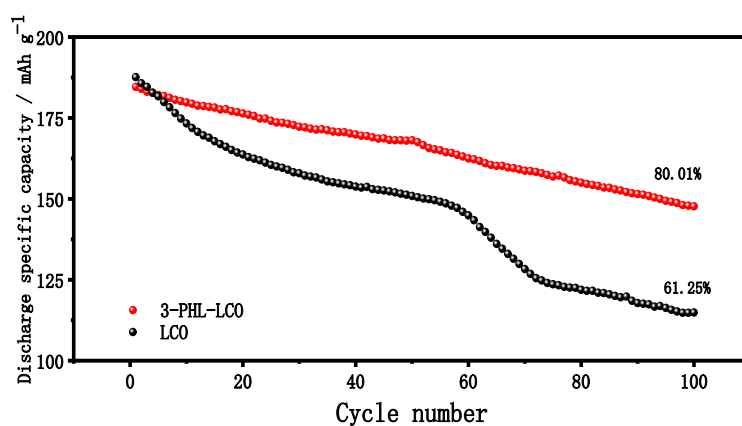

**Fig. S2.** Long cycle performance of bare LCO and 3-PHL-LCO at 50 °C between 3.0 and 4.6 V.
